# Supplementary material for: Exploiting loss of heterozygosity for allele-selective colorectal cancer chemotherapy
Source: PubMed Central journal article supplement (PMC7066191; doi:10.1038/s41467-020-15111-4), 2020-03-11
Supplement: 41467_2020_15111_MOESM2_ESM.pdf [file 41467_2020_15111_MOESM2_ESM.pdf]

## **Description of Additional Supplementary Files**

File Name: Supplementary Data 1

Description: Prevalent SNVs that alter amino acids in or near active surfaces of intracellular enzymes
